# Supplementary material
Source: Springer Nature journal article supplement (https://www.springermedizin.de/resource/supplementary/12947_2009_279_MOESM1_ESM.pdf/9556602)

**A**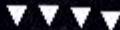

-1

-2

MED  
T1 00:00**B**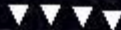

-1

-2

MED  
T1 00:00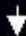66  
BPM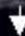64  
BPM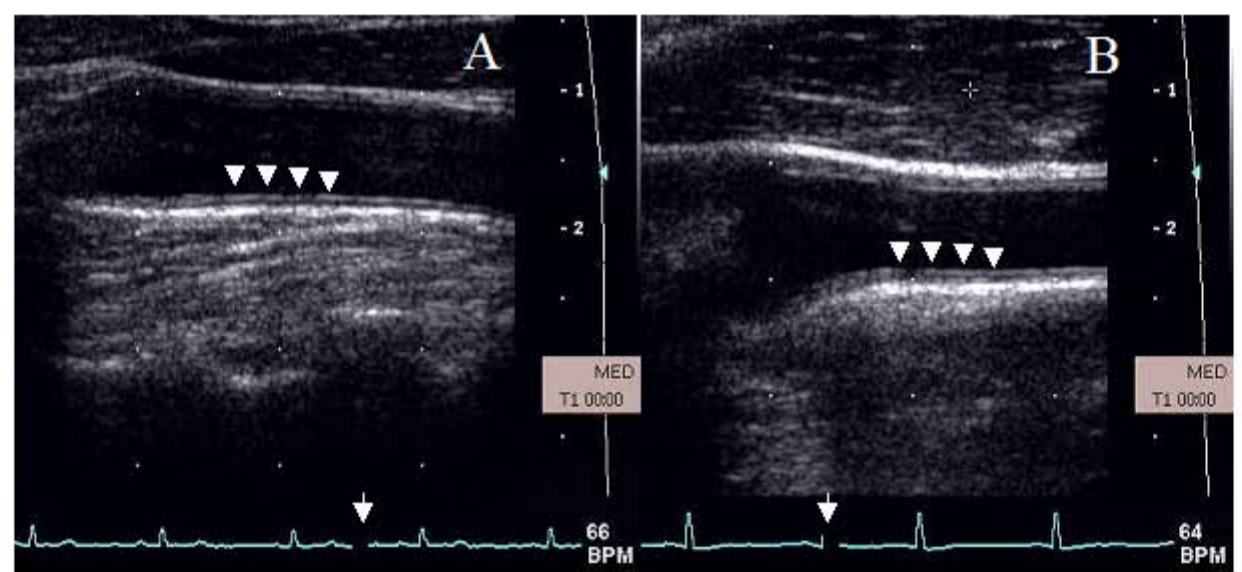

Supplement: MOESM1 [file 9556602]
